# Supplementary material for: 4-D imaging of sub-second dynamics in pore-scale processes using real-time synchrotron X-ray tomography
Source: Copernicus journal article supplement (doi:10.5194/se-7-1059-2016), 2016-07-15
Supplement: Supplementary file 1 [file se-7-1059-2016-supplement.zip]

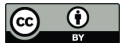

## *Supplement of*

# **4-D imaging of sub-second dynamics in pore-scale processes using real-time synchrotron X-ray tomography**

**Katherine J. Dobson et al.**

*Correspondence to:* Katherine J. Dobson ([katherine.dobson@durham.ac.uk](mailto:katherine.dobson@durham.ac.uk))

- [se-7-1059-2016-supplement-title-page.pdf](#)
- [Figure1.svg](#)
- [Movie 1.gif](#)

The copyright of individual parts of the supplement might differ from the CC-BY 3.0 licence.
